# Supplementary material for: The Effect of Dietary Supplementation with Resveratrol on Growth Performance, Carcass and Meat Quality, Blood Lipid Levels and Ruminal Microbiota in Fattening Goats
Source: MDPI journal article supplement (doi:10.3390/foods11040598), 2022-02-18
Supplement: s1 [file s1]

## Supplementary Tables

**Table S1.** Effect of dietary resveratrol supplementation on blood physiological index of goats.

| Parameters                                      | Control          | 150mg/kg         | 300mg/kg         | 600mg/kg         |
|-------------------------------------------------|------------------|------------------|------------------|------------------|
| White blood cell count (10 <sup>9</sup> /L)     | 15.92 ± 1.98     | 15.68 ± 1.40     | 16.75 ± 1.38     | 15.34 ± 1.38     |
| Lymphocyte ratio (%)                            | 33.74 ± 2.39     | 36.48 ± 4.07     | 36.44 ± 2.97     | 36.71 ± 12.43    |
| Intermediate cell ratio (%)                     | 13.71 ± 1.11     | 12.25 ± 0.56     | 14.30 ± 3.46     | 13.53 ± 0.68     |
| Granulocyte ratio (%)                           | 52.57 ± 2.61     | 51.27 ± 4.09     | 49.26 ± 2.41     | 49.76 ± 3.63     |
| Lymphocyte count (10 <sup>9</sup> /L)           | 5.54 ± 0.92      | 6.06 ± 1.06      | 6.21 ± 0.80      | 5.74 ± 0.92      |
| Intermediate cell count (10 <sup>9</sup> /L)    | 2.20 ± 0.32      | 1.91 ± 0.16      | 2.38 ± 0.24      | 2.03 ± 0.51      |
| Granulocyte counts (10 <sup>9</sup> /L)         | 8.18 ± 0.97      | 7.71±0.56        | 8.16±0.73        | 7.57±0.78        |
| Red blood cell count (10 <sup>12</sup> /L)      | 1.10±0.12        | 0.96 ± 0.09      | 0.87 ± 0.04      | 0.89 ± 0.05      |
| Hemoglobin (g/L)                                | 102.50 ± 4.51    | 94.30 ± 4.34     | 101.2 ± 1.87     | 103.6 ± 5.00     |
| Hematocrit (%)                                  | 4.13 ± 0.44      | 3.62 ± 0.17      | 3.96 ± 0.19      | 3.74 ± 0.23      |
| Mean corpuscular volume (fL)                    | 42.41 ± 0.22     | 42.19 ± 0.25     | 42.57 ± 0.25     | 42.60 ± 0.29     |
| Mean corpuscular hemoglobin (pg)                | 105.16 ± 9.11    | 117.81 ± 4.23    | 100.53 ± 8.41    | 118.46 ± 5.74    |
| Mean corpuscular hemoglobin concentration (g/L) | 2491.50 ± 241.01 | 2581.30 ± 112.54 | 2309.80 ± 209.13 | 2625.70 ± 135.40 |
| Red blood Cell distribution width - SD (fL)     | 16.13 ± 0.41     | 16.13 ± 0.41     | 16.32 ± 0.25     | 16.13 ± 0.41     |
| Red blood Cell distribution width - CV (%)      | 11.84 ± 0.28     | 12.14 ± 0.23     | 12.50 ± 0.20     | 12.27 ± 0.29     |

Values are shown as mean ± SEM.

**Table S2.** Summary of the full-length 16S rRNA sequencing data of rumen fluid samples in fattening goats.

| Treat    | Sample ID | Raw CCS | Clean CCS | Effective CCS | AvgLen(bp) | Effective(%) | ACE      | Chao1    | Simpson | Shannon | Coverage |
|----------|-----------|---------|-----------|---------------|------------|--------------|----------|----------|---------|---------|----------|
| Control  | CON1      | 6174    | 5499      | 5420          | 1452       | 87.79        | 267.4269 | 263.2432 | 0.9708  | 6.0246  | 0.9859   |
|          | CON2      | 7970    | 7166      | 7088          | 1454       | 88.93        | 278.6064 | 285.7241 | 0.9221  | 4.9821  | 0.987    |
|          | CON3      | 7974    | 7179      | 7108          | 1452       | 89.14        | 224.3861 | 209.25   | 0.8562  | 4.1348  | 0.9915   |
|          | CON4      | 8023    | 7028      | 6789          | 1454       | 84.62        | 300.7059 | 392.2353 | 0.9558  | 5.6846  | 0.9804   |
|          | CON5      | 7151    | 6374      | 6282          | 1455       | 87.85        | 301.4747 | 312.2    | 0.9632  | 5.9768  | 0.9851   |
|          | CON6      | 7942    | 7343      | 7089          | 1449       | 89.26        | 122.8296 | 117.25   | 0.8409  | 3.6526  | 0.9961   |
| 150mg/kg | RES1      | 7702    | 7142      | 7140          | 1456       | 92.7         | 185.6078 | 190.1667 | 0.9542  | 5.2151  | 0.9951   |
|          | RES2      | 7984    | 7167      | 7130          | 1454       | 89.3         | 254.0507 | 252.3636 | 0.8364  | 4.3548  | 0.9888   |
|          | RES3      | 8004    | 7015      | 6899          | 1455       | 86.19        | 212.7329 | 203.8889 | 0.9618  | 5.5351  | 0.9907   |
|          | RES4      | 8007    | 6988      | 6864          | 1456       | 85.72        | 203.1614 | 220.25   | 0.9546  | 5.5721  | 0.99     |
|          | RES5      | 7353    | 6717      | 6707          | 1456       | 91.21        | 235.5426 | 242      | 0.9635  | 5.6109  | 0.9927   |
|          | RES6      | 7730    | 7141      | 7137          | 1455       | 92.33        | 278.7251 | 272.3333 | 0.9231  | 5.3035  | 0.993    |
| 300mg/kg | RES7      | 7706    | 7111      | 7101          | 1450       | 92.15        | 266.3959 | 278.875  | 0.9408  | 5.2027  | 0.9918   |
|          | RES8      | 8012    | 7257      | 6973          | 1458       | 87.03        | 90.5503  | 94       | 0.8636  | 3.5525  | 0.9969   |
|          | RES9      | 7969    | 7106      | 7005          | 1452       | 87.9         | 311.6897 | 313.0303 | 0.9637  | 5.8669  | 0.9862   |
|          | RES10     | 7960    | 7322      | 7313          | 1450       | 91.87        | 153.3864 | 168.5    | 0.9184  | 4.4448  | 0.9955   |
|          | RES11     | 7017    | 6367      | 6358          | 1456       | 90.61        | 312.8869 | 323.0312 | 0.9673  | 5.8419  | 0.9882   |
|          | RES12     | 7014    | 6286      | 6231          | 1450       | 88.84        | 122.0649 | 133.25   | 0.8687  | 4.1591  | 0.9955   |
| 600mg/kg | RES13     | 8013    | 7273      | 7210          | 1455       | 89.98        | 259.4854 | 255.3636 | 0.9526  | 5.6515  | 0.9927   |
|          | RES14     | 7988    | 7247      | 7224          | 1457       | 90.44        | 272.3299 | 278.25   | 0.9511  | 5.2927  | 0.9903   |
|          | RES15     | 8023    | 7246      | 7163          | 1445       | 89.28        | 240.0335 | 251.7727 | 0.7825  | 3.7387  | 0.9892   |
|          | RES16     | 8022    | 7271      | 7183          | 1456       | 89.54        | 344.2046 | 341      | 0.9788  | 6.4722  | 0.9886   |
|          | RES17     | 8031    | 7245      | 7174          | 1456       | 89.33        | 240.2376 | 248      | 0.906   | 4.8231  | 0.9906   |
|          | RES18     | 7943    | 7086      | 6998          | 1460       | 88.1         | 293.1216 | 308.6667 | 0.94    | 5.5342  | 0.9871   |

**Table S3.** The 23 bacterial genera significantly affected by dietary resveratrol supplementation in fattening goats.

| Genus                                        | Control (%)                  | 150mg/kg (%)                 | 300mg/kg (%)                  | 600mg/kg (%)                 |
|----------------------------------------------|------------------------------|------------------------------|-------------------------------|------------------------------|
| Lachnospiraceae_NK3A20_group                 | 5.90 ± 1.71 <sup>ab</sup>    | 11.53 ± 2.02 <sup>a</sup>    | 3.74 ± 1.19 <sup>b</sup>      | 8.12 ± 2.19 <sup>ab</sup>    |
| Ruminococcaceae_NK4A214_group                | 5.77 ± 1.64 <sup>ab</sup>    | 7.57 ± 1.80 <sup>ab</sup>    | 3.33 ± 1.25 <sup>b</sup>      | 10.22 ± 3.00 <sup>a</sup>    |
| uncultured_bacterium_f_p-2534-18B5_gut_group | 4.01 ± 3.98 <sup>ab</sup>    | 0.0033 ± 0.0033 <sup>b</sup> | 2.14 ± 2.00 <sup>a</sup>      | 0.26 ± 0.18 <sup>a</sup>     |
| [Eubacterium]_coprostanoligenes_group        | 3.55 ± 0.90 <sup>ab</sup>    | 4.78 ± 1.02 <sup>a</sup>     | 5.95 ± 2.98 <sup>ab</sup>     | 1.87 ± 0.49 <sup>b</sup>     |
| uncultured_bacterium_o_WCHB1-41              | 2.88 ± 1.35 <sup>b</sup>     | 8.62 ± 3.79 <sup>ab</sup>    | 9.96 ± 4.77 <sup>ab</sup>     | 8.91 ± 1.93 <sup>a</sup>     |
| Lachnoclostridium_1                          | 1.90 ± 1.31 <sup>ab</sup>    | 3.61 ± 1.11 <sup>a</sup>     | 0.99 ± 0.26 <sup>b</sup>      | 0.99 ± 0.34 <sup>b</sup>     |
| Moryella                                     | 1.82 ± 0.52 <sup>b</sup>     | 6.37 ± 1.37 <sup>Aa</sup>    | 1.60 ± 0.52 <sup>b</sup>      | 1.20 ± 0.29 <sup>Bb</sup>    |
| Ruminococcus_2                               | 1.70 ± 1.34 <sup>ab</sup>    | 0.12 ± 0.071 <sup>ab</sup>   | 0.024 ± 0.024 <sup>b</sup>    | 0.73 ± 0.54 <sup>a</sup>     |
| Prevotella_1                                 | 1.33 ± 1.01 <sup>a</sup>     | 0.16 ± 0.16 <sup>b</sup>     | 0.21 ± 0.10 <sup>ab</sup>     | 0.68 ± 0.59 <sup>a</sup>     |
| Flexilinea                                   | 1.03 ± 0.39 <sup>ab</sup>    | 2.51 ± 0.76 <sup>a</sup>     | 0.36 ± 0.23 <sup>b</sup>      | 1.65 ± 0.40 <sup>a</sup>     |
| Acetitomaculum                               | 0.71 ± 0.23 <sup>b</sup>     | 1.63 ± 0.54 <sup>a</sup>     | 0.27 ± 0.10 <sup>b</sup>      | 0.33 ± 0.14 <sup>b</sup>     |
| Lachnospiraceae_UCG-002                      | 0.57 ± 0.17 <sup>ab</sup>    | 0.82 ± 0.12 <sup>a</sup>     | 0.47 ± 0.21 <sup>ab</sup>     | 0.44 ± 0.076 <sup>b</sup>    |
| DNF00809                                     | 0.33 ± 0.22 <sup>a</sup>     | 0.087 ± 0.021 <sup>a</sup>   | 0.015 ± 0.010 <sup>Bb</sup>   | 0.17 ± 0.056 <sup>Aa</sup>   |
| uncultured_bacterium_f_Christensenellaceae   | 0.23 ± 0.12 <sup>a</sup>     | 0.027 ± 0.016 <sup>b</sup>   | 0.046 ± 0.019 <sup>ab</sup>   | 0.053 ± 0.018 <sup>ab</sup>  |
| Butyrivibrio_2                               | 0.23 ± 0.11 <sup>ab</sup>    | 0.36 ± 0.12 <sup>a</sup>     | 0.094 ± 0.037 <sup>b</sup>    | 0.29 ± 0.052 <sup>a</sup>    |
| [Eubacterium]_hallii_group                   | 0.21 ± 0.082 <sup>b</sup>    | 0.65 ± 0.25 <sup>a</sup>     | 0.20 ± 0.068 <sup>b</sup>     | 0.23 ± 0.071 <sup>ab</sup>   |
| uncultured_bacterium_o_Coriobacteriales      | 0.16 ± 0.089 <sup>b</sup>    | 1.10 ± 0.31 <sup>a</sup>     | 0.60 ± 0.45 <sup>ab</sup>     | 0.37 ± 0.15 <sup>ab</sup>    |
| Desulfovibrio                                | 0.15 ± 0.14 <sup>ab</sup>    | 0.015 ± 0.0094 <sup>b</sup>  | 0.16 ± 0.072 <sup>ab</sup>    | 0.17 ± 0.088 <sup>a</sup>    |
| Atopobium                                    | 0.14 ± 0.043 <sup>ab</sup>   | 0.13 ± 0.049 <sup>a</sup>    | 0.040 ± 0.037 <sup>b</sup>    | 0.048 ± 0.018 <sup>ab</sup>  |
| Erysipelotrichaceae_UCG-009                  | 0.054 ± 0.034 <sup>b</sup>   | 1.11 ± 0.70 <sup>a</sup>     | 0.16 ± 0.11 <sup>ab</sup>     | 0.088 ± 0.041 <sup>ab</sup>  |
| Lachnospiraceae_ND3007_group                 | 0.036 ± 0.027 <sup>ab</sup>  | 0 ± 0 <sup>b</sup>           | 0.024 ± 0.024 <sup>ab</sup>   | 0.051 ± 0.036 <sup>a</sup>   |
| uncultured_bacterium_f_Atopobiaceae          | 0.026 ± 0.0088 <sup>ab</sup> | 0.11 ± 0.061 <sup>a</sup>    | 0.0025 ± 0.0025 <sup>b</sup>  | 0.021 ± 0.0086 <sup>ab</sup> |
| Desulfobulbus                                | 0.020 ± 0.017 <sup>b</sup>   | 0 ± 0 <sup>Bb</sup>          | 0.0089 ± 0.0040 <sup>Bb</sup> | 0.031 ± 0.010 <sup>Aa</sup>  |

Values are shown as mean ± SEM, *n* = 6.

**Table S4.** The 26 bacterial species significantly affected by dietary resveratrol supplementation in fattening goats

| Species                                                      | Control                      | 150mg/kg                     | 300mg/kg                      | 600mg/kg                     |
|--------------------------------------------------------------|------------------------------|------------------------------|-------------------------------|------------------------------|
| uncultured_bacterium_g_Ruminococcaceae_NK4A214_group         | 5.77 ± 1.64 <sup>ab</sup>    | 7.57 ± 1.80 <sup>ab</sup>    | 3.33 ± 1.25 <sup>b</sup>      | 10.22 ± 3.00 <sup>a</sup>    |
| uncultured_bacterium_g_Lachnospiraceae_NK3A20_group          | 5.28 ± 1.68 <sup>AB</sup>    | 10.31 ± 1.75 <sup>A</sup>    | 3.01 ± 0.93 <sup>B</sup>      | 7.06 ± 1.93 <sup>AB</sup>    |
| uncultured_bacterium_f_p-2534-18B5_gut_group                 | 4.01 ± 3.98 <sup>ab</sup>    | 0.0033 ± 0.0033 <sup>b</sup> | 2.14 ± 2.00 <sup>ab</sup>     | 0.26 ± 0.18 <sup>a</sup>     |
| uncultured_bacterium_g_[Eubacterium]_coprostanoligenes_group | 3.55 ± 0.90 <sup>ab</sup>    | 4.78 ± 1.02 <sup>a</sup>     | 5.95 ± 2.98 <sup>ab</sup>     | 1.87 ± 0.49 <sup>b</sup>     |
| uncultured_bacterium_o_WCHB1-41                              | 2.88 ± 1.35 <sup>b</sup>     | 8.62 ± 3.79 <sup>ab</sup>    | 9.96 ± 4.77 <sup>ab</sup>     | 8.91 ± 1.83 <sup>a</sup>     |
| Ruminococcus_flavefaciens                                    | 2.20 ± 1.97 <sup>a</sup>     | 0.19 ± 0.12 <sup>ab</sup>    | 0.022 ± 0.014 <sup>b</sup>    | 0.92 ± 0.88 <sup>ab</sup>    |
| uncultured_bacterium_g_Lachnoclostridium_1                   | 1.90 ± 1.31 <sup>ab</sup>    | 3.61 ± 1.11 <sup>a</sup>     | 0.99 ± 0.26 <sup>b</sup>      | 0.99 ± 0.34 <sup>b</sup>     |
| uncultured_bacterium_g_Moryella                              | 1.70 ± 0.49 <sup>b</sup>     | 5.91 ± 1.30 <sup>Aa</sup>    | 1.48 ± 0.49 <sup>b</sup>      | 1.07 ± 0.26 <sup>Bb</sup>    |
| uncultured_bacterium_g_Oribacterium                          | 1.64 ± 0.68 <sup>ab</sup>    | 4.50 ± 1.38 <sup>a</sup>     | 2.53 ± 0.78 <sup>ab</sup>     | 1.29 ± 0.30 <sup>b</sup>     |
| uncultured_bacterium_g_Prevotella_1                          | 1.33 ± 1.01 <sup>a</sup>     | 0.16 ± 0.15 <sup>b</sup>     | 0.21 ± 0.10 <sup>ab</sup>     | 0.68 ± 0.59 <sup>a</sup>     |
| uncultured_bacterium_g_Flexilinea                            | 1.03 ± 0.39 <sup>ab</sup>    | 2.51 ± 0.76 <sup>a</sup>     | 0.36 ± 0.23 <sup>b</sup>      | 1.65 ± 0.40 <sup>a</sup>     |
| uncultured_bacterium_g_Acetitomaculum                        | 0.71 ± 0.23 <sup>b</sup>     | 1.63 ± 0.54 <sup>a</sup>     | 0.27 ± 0.10 <sup>b</sup>      | 0.33 ± 0.14 <sup>b</sup>     |
| uncultured_bacterium_g_Lachnospiraceae_UCG-002               | 0.57 ± 0.17 <sup>ab</sup>    | 0.82 ± 0.12 <sup>a</sup>     | 0.47 ± 0.21 <sup>ab</sup>     | 0.44 ± 0.076 <sup>b</sup>    |
| Olsenella_scatoligenes                                       | 0.34 ± 0.15 <sup>ab</sup>    | 0.64 ± 0.30 <sup>a</sup>     | 0.24 ± 0.18 <sup>ab</sup>     | 0.057 ± 0.024 <sup>b</sup>   |
| uncultured_bacterium_g_DNF00809                              | 0.33 ± 0.22 <sup>a</sup>     | 0.087 ± 0.021 <sup>a</sup>   | 0.015 ± 0.010 <sup>Bb</sup>   | 0.17 ± 0.058 <sup>Aa</sup>   |
| uncultured_bacterium_f_Christensenellaceae                   | 0.23 ± 0.12 <sup>a</sup>     | 0.027 ± 0.016 <sup>b</sup>   | 0.046 ± 0.019 <sup>ab</sup>   | 0.053 ± 0.018 <sup>ab</sup>  |
| uncultured_bacterium_g_Butyrovibrio_2                        | 0.23 ± 0.11 <sup>ab</sup>    | 0.36 ± 0.12 <sup>ab</sup>    | 0.094 ± 0.037 <sup>b</sup>    | 0.29 ± 0.052 <sup>a</sup>    |
| uncultured_bacterium_g_[Eubacterium]_hallii_group            | 0.21 ± 0.082 <sup>b</sup>    | 0.65 ± 0.25 <sup>a</sup>     | 0.20 ± 0.068 <sup>b</sup>     | 0.23 ± 0.071 <sup>ab</sup>   |
| uncultured_bacterium_o_Coriobacteriales                      | 0.16 ± 0.089 <sup>b</sup>    | 1.10 ± 0.31 <sup>a</sup>     | 0.60 ± 0.45 <sup>ab</sup>     | 0.37 ± 0.15 <sup>ab</sup>    |
| uncultured_bacterium_g_Desulfovibrio                         | 0.15 ± 0.14 <sup>ab</sup>    | 0.015 ± 0.0094 <sup>b</sup>  | 0.081 ± 0.038 <sup>ab</sup>   | 0.17 ± 0.088 <sup>a</sup>    |
| uncultured_bacterium_g_Attopobium                            | 0.076 ± 0.031 <sup>ab</sup>  | 0.12 ± 0.047 <sup>Aa</sup>   | 0.030 ± 0.030 <sup>b</sup>    | 0.024 ± 0.0076 <sup>Bb</sup> |
| uncultured_bacterium_g_Erysipelotrichaceae_UCG-009           | 0.054 ± 0.034 <sup>b</sup>   | 1.11 ± 0.70 <sup>a</sup>     | 0.16 ± 0.11 <sup>ab</sup>     | 0.088 ± 0.041 <sup>ab</sup>  |
| uncultured_bacterium_g_Lachnospiraceae_ND3007_group          | 0.036 ± 0.027 <sup>ab</sup>  | 0 ± 0 <sup>b</sup>           | 0.024 ± 0.024 <sup>ab</sup>   | 0.051 ± 0.036 <sup>a</sup>   |
| uncultured_bacterium_f_Attopobiaceae                         | 0.026 ± 0.0088 <sup>ab</sup> | 0.11 ± 0.061 <sup>a</sup>    | 0.0025 ± 0.0025 <sup>b</sup>  | 0.021 ± 0.0086 <sup>ab</sup> |
| Oribacterium_sp                                              | 0.024 ± 0.010 <sup>B</sup>   | 0.92 ± 0.37 <sup>A</sup>     | 4.90 ± 4.58 <sup>AB</sup>     | 0.28 ± 0.14 <sup>AB</sup>    |
| uncultured_bacterium_g_Desulfovulbus                         | 0.020 ± 0.017 <sup>b</sup>   | 0 ± 0 <sup>Bb</sup>          | 0.0089 ± 0.0040 <sup>Bb</sup> | 0.094 ± 0.022 <sup>Aa</sup>  |

Values are shown as mean ± SEM, *n*=6.
